# Supplementary material
Source: PubMed Central journal article supplement (PMC7349128)
Supplement: jamaophthalmol-138-835-s003.pdf [file jamaophthalmol-138-835-s003.pdf]

## **Data Sharing Statement**

Jackson. Evaluation of Month-24 Efficacy and Safety of Epimacular Brachytherapy for Previously Treated Neovascular Age-Related Macular Degeneration. Published July 09, 2020.

10.1001/jamaophthalmol.2020.2309

### **Data**

**Data available:** No

### **Additional Information**

**Explanation for why data not available:** No consent obtained from patients for sharing data
